# Supplementary material for: Pupil light reflex dynamics in Parkinson’s disease
Source: Front Integr Neurosci. 2023 Aug 31;17:1249554. doi: 10.3389/fnint.2023.1249554 (PMC10506153; doi:10.3389/fnint.2023.1249554)
Supplement: Supplementary file 3 [file Table_2.XLSX]

## Sheet: short flash _HC-PD
	mean pupil diameter			sd pupil diameter			latency			minimum pupil diameter			time to max constriction			constriction amplitude			constriction amplitude percentage change			constriction velocity			peak constriction velocity			time to peak constriction velocity			constriction slope			constriction intercept			dilation amplitude			dilation amplitude percentage change			dilation velocity			peak dilation velocity			time to peak dilation velocity
Predictors	Estimates	CI	p	Estimates	CI	p	Estimates	CI	p	Estimates	CI	p	Estimates	CI	p	Estimates	CI	p	Estimates	CI	p	Estimates	CI	p	Estimates	CI	p	Estimates	CI	p	Estimates	CI	p	Estimates	CI	p	Estimates	CI	p	Estimates	CI	p	Estimates	CI	p	Estimates	CI	p	Estimates
(Intercept)	1.43	-0.17 – 3.03	0.081	1.04	-0.41 – 2.49	0.159	-1.22	-2.39 – -0.05	0.041	1.03	-0.59 – 2.65	0.213	-0.58	-1.78 – 0.62	0.343	-1.28	-2.69 – 0.13	0.076	-0.84	-2.15 – 0.47	0.208	-1.62	-3.03 – -0.21	0.025	-1.5	-2.77 – -0.23	0.02	-1	-2.14 – 0.13	0.083	-1.7	-3.12 – -0.28	0.019	1.49	-0.05 – 3.04	0.058	1.07	-0.31 – 2.45	0.128	0.55	-0.76 – 1.86	0.413	1.06	-0.31 – 2.43	0.128	-0.49	-1.80 – 0.82	0.465	-1.3
group	-0.25	-0.73 – 0.23	0.313	-0.32	-0.75 – 0.12	0.155	0.11	-0.24 – 0.46	0.534	-0.11	-0.59 – 0.38	0.662	-0.04	-0.40 – 0.32	0.818	0.36	-0.07 – 0.78	0.097	0.33	-0.06 – 0.72	0.1	0.28	-0.15 – 0.70	0.2	0.43	0.05 – 0.81	0.027	0.02	-0.32 – 0.36	0.895	0.28	-0.14 – 0.71	0.195	-0.28	-0.74 – 0.18	0.235	-0.37	-0.79 – 0.04	0.077	-0.32	-0.71 – 0.08	0.115	-0.39	-0.80 – 0.02	0.062	0.02	-0.37 – 0.42	0.91	0.16
age	-0.02	-0.04 – 0.00	0.108	-0.02	-0.04 – 0.00	0.078	0.02	0.00 – 0.03	0.045	-0.01	-0.03 – 0.01	0.373	0.01	-0.01 – 0.03	0.309	0.02	0.00 – 0.04	0.036	0.02	-0.00 – 0.04	0.082	0.03	0.01 – 0.05	0.013	0.02	0.00 – 0.04	0.017	0.01	-0.00 – 0.03	0.101	0.03	0.01 – 0.05	0.01	-0.02	-0.04 – 0.00	0.063	-0.02	-0.04 – 0.00	0.065	-0.01	-0.03 – 0.01	0.195	-0.02	-0.04 – 0.00	0.062	0.01	-0.01 – 0.03	0.296	0.02
sex	-0.08	-0.56 – 0.40	0.744	0.18	-0.25 – 0.62	0.405	0.07	-0.28 – 0.42	0.707	-0.2	-0.68 – 0.28	0.417	0.04	-0.32 – 0.39	0.848	-0.17	-0.59 – 0.25	0.436	-0.24	-0.63 – 0.15	0.234	-0.07	-0.49 – 0.35	0.738	-0.07	-0.45 – 0.31	0.708	0.11	-0.23 – 0.45	0.53	-0.06	-0.48 – 0.37	0.796	-0.03	-0.49 – 0.43	0.909	0.18	-0.24 – 0.59	0.401	0.25	-0.14 – 0.64	0.213	0.2	-0.21 – 0.60	0.349	-0.08	-0.48 – 0.31	0.679	-0.18
Random Effects
σ2	0.08			0.28			0.64			0.12			0.64			0.31			0.47			0.32			0.46			0.75			0.32			0.14			0.36			0.48			0.36			0.59			0.69
τ00	0.91			0.70			0.36			0.92			0.39			0.65			0.52			0.65			0.48			0.31			0.66			0.83			0.61			0.52			0.60			0.50			0.27
ICC	0.92			0.71			0.36			0.89			0.38			0.67			0.52			0.67			0.51			0.29			0.67			0.85			0.63			0.52			0.62			0.46			0.28
Linear mixed-effects model with respect to diagnosis, age and sex
[truncated: 23 more columns]

## Sheet: long flash_HC-PD
	pupil diameter mean			pupil diameter sd			latency			minimum pupil diameter			time to max constriction			constriction amplitude			constriction amplitude percentage change			constriction velocity			peak constriction velocity			time to peak constriction velocity			constriction slope			constriction intercept			dilation amplitude			dilation amplitude percentage change			dilation velocity			peak dilation velocity			time to peak dilation velocity
Predictors	Estimates	CI	p	Estimates	CI	p	Estimates	CI	p	Estimates	CI	p	Estimates	CI	p	Estimates	CI	p	Estimates	CI	p	Estimates	CI	p	Estimates	CI	p	Estimates	CI	p	Estimates	CI	p	Estimates	CI	p	Estimates	CI	p	Estimates	CI	p	Estimates	CI	p	Estimates	CI	p	Estimates
(Intercept)	0.28	-0.41 – 0.96	0.428	-0.11	-0.75 – 0.53	0.738	-0.46	-0.88 – -0.04	0.034	0.42	-0.28 – 1.13	0.242	-0.1	-0.53 – 0.34	0.665	0.07	-0.55 – 0.70	0.823	0.23	-0.36 – 0.82	0.442	-0.01	-0.61 – 0.60	0.983	-0.01	-0.61 – 0.59	0.977	-0.13	-0.59 – 0.32	0.57	-0.03	-0.63 – 0.57	0.915	0.16	-0.49 – 0.82	0.627	-0.09	-0.71 – 0.53	0.772	-0.31	-0.91 – 0.29	0.308	-0.09	-0.71 – 0.53	0.779	0.14	-0.35 – 0.63	0.566	-0.07
participant_group [PD]	-0.31	-0.78 – 0.16	0.192	-0.3	-0.74 – 0.13	0.171	0.1	-0.19 – 0.39	0.498	-0.19	-0.67 – 0.29	0.433	-0.17	-0.47 – 0.12	0.252	0.31	-0.11 – 0.74	0.15	0.26	-0.14 – 0.66	0.198	0.3	-0.11 – 0.72	0.149	0.5	0.09 – 0.91	0.018	0.12	-0.19 – 0.43	0.463	0.33	-0.07 – 0.74	0.108	-0.32	-0.77 – 0.12	0.156	-0.31	-0.73 – 0.12	0.155	-0.27	-0.68 – 0.14	0.199	-0.29	-0.71 – 0.14	0.183	0.12	-0.22 – 0.45	0.492	0.29
age	-0.15	-0.37 – 0.07	0.173	-0.2	-0.41 – -0.00	0.05	0.05	-0.08 – 0.18	0.469	-0.03	-0.26 – 0.19	0.769	-0.05	-0.19 – 0.09	0.504	0.2	-0.00 – 0.40	0.053	0.17	-0.02 – 0.35	0.079	0.18	-0.01 – 0.37	0.069	0.12	-0.07 – 0.32	0.203	0.1	-0.05 – 0.24	0.184	0.17	-0.02 – 0.36	0.087	-0.16	-0.36 – 0.05	0.147	-0.21	-0.40 – -0.01	0.042	-0.21	-0.40 – -0.02	0.031	-0.2	-0.40 – -0.00	0.046	0.06	-0.10 – 0.21	0.465	0.2
sex	-0.09	-0.55 – 0.38	0.719	0.17	-0.26 – 0.60	0.442	0.27	-0.01 – 0.56	0.063	-0.22	-0.70 – 0.26	0.371	0.13	-0.17 – 0.42	0.405	-0.15	-0.58 – 0.27	0.486	-0.24	-0.64 – 0.16	0.234	-0.1	-0.51 – 0.31	0.645	-0.16	-0.57 – 0.25	0.445	0.05	-0.26 – 0.36	0.76	-0.09	-0.50 – 0.32	0.665	0	-0.45 – 0.44	0.992	0.16	-0.26 – 0.58	0.457	0.3	-0.11 – 0.70	0.156	0.15	-0.27 – 0.58	0.481	-0.14	-0.47 – 0.19	0.419	-0.05
Random Effects
σ2	0.14			0.27			0.83			0.11			0.82			0.3			0.42			0.36			0.35			0.77			0.38			0.23			0.32			0.36			0.31			0.72			0.59
τ00	0.85			0.71			0.16			0.91			0.19			0.67			0.55			0.61			0.61			0.23			0.59			0.76			0.65			0.60			0.66			0.30			0.37
ICC	0.86			0.73			0.16			0.89			0.19			0.69			0.57			0.63			0.63			0.23			0.61			0.77			0.67			0.63			0.68			0.29			0.39
[truncated: 23 more columns]
